# Supplementary material for: Participant retention in trauma intensive care unit (ICU) follow-up studies: a post-hoc analysis of a previous scoping review
Source: HighWire-hosted journal article supplement (doi:10.1136/tsaco-2020-000584), 2020-11-01
Supplement: tsaco-2020-000584supp001_data_supplement.pdf [file tsaco-2020-000584supp001_data_supplement.pdf]

## Supplementary Material for

### Participant Retention in Trauma Intensive Care Unit (ICU) Follow-up Studies: A Methodological Synthesis of Existing Studies

Himanshu Rawal, MD<sup>1</sup>  
Daniel L. Young, PT, DPT, PhD<sup>2,3,4</sup>  
Roozbeh Nikooie, MD<sup>5</sup>  
Awsse Al-Ani, MBBS<sup>1</sup>  
Lisa Aronson Friedman, ScM<sup>4,6</sup>  
Sumana Vasishta<sup>7</sup>  
Elliott R Haut, MD, PhD, FACS<sup>8,9,10,11,12</sup>  
Elizabeth Colantuoni, PhD<sup>4,13</sup>  
Dale M. Needham, FCPA, MD, PhD<sup>3,4,6,14</sup>  
Victor D. Dinglas, MPH<sup>4,6</sup>

<sup>1</sup>MedStar Union Memorial Hospital, Baltimore, MD

<sup>2</sup>Department of Physical Therapy, University of Nevada, Las Vegas; Las Vegas, NV

<sup>3</sup>Department of Physical Medicine and Rehabilitation, School of Medicine, Johns Hopkins University, Baltimore

<sup>4</sup>Outcomes After Critical Illness and Surgery Group, Johns Hopkins University, Baltimore, MD

<sup>5</sup>Department of Internal Medicine, Yale New Haven Hospital, New Haven, CT

<sup>6</sup>Division of Pulmonary and Critical Care Medicine, School of Medicine, Johns Hopkins University, Baltimore, MD

<sup>7</sup>Institute of Nephro Urology Mysuru Branch, Krishan Rajendra Hospital Campus, Mysuru, India

<sup>8</sup>Division of Acute Care Surgery, Department of Surgery, School of Medicine, Johns Hopkins University, Baltimore, MD

<sup>9</sup>Department of Anesthesiology and Critical Care Medicine, School of Medicine, Johns Hopkins University, Baltimore, MD

<sup>10</sup>Department of Emergency Medicine, School of Medicine, Johns Hopkins University, Baltimore, MD

<sup>11</sup>The Armstrong Institute for Patient Safety and Quality, Johns Hopkins Medicine, Baltimore, MD

<sup>12</sup>Department of Health Policy and Management, Johns Hopkins Bloomberg School of Public Health, Baltimore, MD

<sup>13</sup>Department of Biostatistics, Johns Hopkins Bloomberg School of Public Health, Baltimore, MD

<sup>14</sup>School of Nursing, Johns Hopkins University, Baltimore MD

**Figure S1: Pooled average retention rates\* in trauma ICU survivor follow up studies**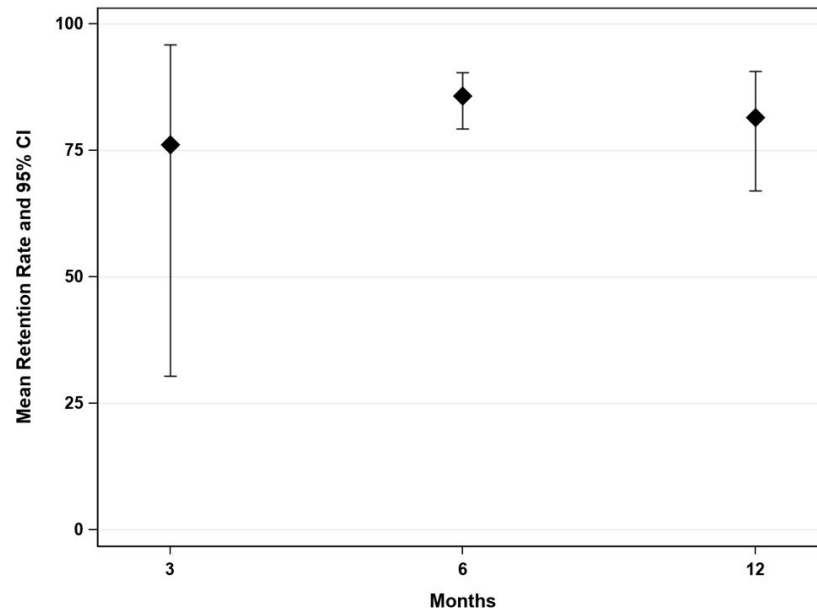

|                               |     |     |      |
|-------------------------------|-----|-----|------|
| N studies                     | 2   | 2   | 6    |
| N participants                | 620 | 226 | 2422 |
| Average cohort retention rate | 76  | 86  | 82   |

**Diamonds in the graph are the pooled average retention rates, while the bars represent 95% confidence interval.**

**\* Retention rates were calculated as the number of participants assessed at each follow-up time-point divided by the number presumed alive at that time-point (this excluded the participants that withdrew and withdrawn just prior to the time-point)**

Linear random effects regression model was used to pool retention rates across all eligible studies and time-points.

**Table S1. Risk of Bias Assessment using Newcastle Ottawa Scale.(16)**

| Study                     | Representativeness of exposed cohort | Selection of non-exposed cohort | Ascertainment of exposure (s) | Comparability of cohorts | Adequacy of follow-up |
|---------------------------|--------------------------------------|---------------------------------|-------------------------------|--------------------------|-----------------------|
| Aitken et al.(23)         | +                                    | NA                              | +                             | +                        | +                     |
| Christensen et al.(6)     | +                                    | NA                              | +                             | ++                       | +                     |
| Richards et al.(24,25,39) | +                                    | NA                              | +                             | ++                       | -                     |
| Orwelius et al.(26)       | +                                    | NA                              | +                             | ++                       | -                     |
| Schnyder et al.(27,28)    | +                                    | NA                              | +                             | ++                       | +                     |
| Toien et al.(29,30)       | +                                    | +                               | +                             | +                        | -                     |
| Hepp et al.(31,32)        | +                                    | NA                              | +                             | ++                       | +                     |
| Davydow et al.(33)        | +                                    | NA                              | +                             | ++                       | +                     |
| Frutiger et al.(34)       | +                                    | NA                              | +                             | -                        | +                     |
| Holbrook et al.(35)       | +                                    | NA                              | ?                             | -                        | -                     |
| Mackenzie et al.(36)      | +                                    | +                               | ?                             | ++                       | -                     |

Legend: "+" = low risk of bias; "?" = unclear risk of bias; "-" = high risk of bias; NA = not applicable; ++ = Using Analysis of Variance (ANOVA) or multivariable regression module or matching on multiple hypothesized confounders
